# Supplementary material
Source: PubMed Central journal article supplement (PMC4717367)
Supplement: tobaccocontrol-2014-051919-s1.pdf [file tobaccocontrol-2014-051919-s1.pdf]

## Appendix 1 Freedom of Information requests that informed this study

Summary of Freedom of Information requests helped to inform the timeline, submitted by other parties and other members of the Tobacco Control Research Group (TCRG) as part of the ongoing monitoring of the lobbying activities of the tobacco industry

| Date submitted | Relevant Directorate General/ Cabinet | Applicant                    | Number of docs released | Reference |
|----------------|---------------------------------------|------------------------------|-------------------------|-----------|
| 21 Jun 11      | Sec Gen                               | Smokefree Partnership        | 4                       | 2011/3378 |
| 6 Jul 11       | Bureau of European Policy Advisors    | Fiona Godfrey                | 3                       | 2011/3676 |
| 6 Jul 11       | ENTR                                  | Fiona Godfrey                | 19                      | 2011/3677 |
| 6 Jul 11       | Trade                                 | Fiona Godfrey                | 6                       | 2011/3678 |
| 27 Apr 12      | SANCO                                 | TCRG                         | 47                      | 2012/2163 |
| 19 Oct 12      | Sec Gen                               | Corporate Observatory Europe | 4                       | 2012/4873 |
| 19 Oct 12      | Barroso                               | TCRG                         | 8                       | 2012/4848 |
| 19 Oct 12      | Barroso                               | Corporate Observatory Europe | 18                      | 2012/4874 |
| 2 Nov 12       | Legal                                 | TCRG                         | 1                       | 2012/5058 |
| 9 Nov 12       | Sec Gen                               | TCRG                         | 20                      | 2012/5130 |
| 21 Jan 13      | Sec Gen                               | Corporate Observatory Europe | 1                       | 2013/243  |
| 21 Jan 13      | Sec Gen                               | Corporate Observatory Europe | 4                       | 2013/246  |
| 6 Feb 13       | Legal                                 | Corporate Observatory Europe | 11                      | 2013/0593 |
| 27 Mar 13      | Sec Gen                               | Corporate Observatory Europe | 6                       | 2013/1860 |
| 27 Mar 13      | Barroso                               | Corporate Observatory Europe | 3                       | 2013/1682 |
| 4 Feb 2014     | SANCO                                 | TCRG                         | 1                       | 2014/588  |

Summary of Freedom of Information requests submitted by authors relating to correspondence between the European Commission and the tobacco industry, private sector organisations and lobby groups relating to the Tobacco Products Directive (TPD)

| Date submitted | Relevant Directorate General/ Cabinet | Requested information                                                                                     | Nr of docs released | Reference |
|----------------|---------------------------------------|-----------------------------------------------------------------------------------------------------------|---------------------|-----------|
| 23 Jul 13      | Legal                                 | Specifically contact with Michele Petite from Nov 2012                                                    | 0                   | 2013/3892 |
| 23 Jul 13      | Sec Gen                               | Correspondence on TPD with third parties from 2010 to 2013                                                | 5                   | 2013/3906 |
| 23 Jul 13      | Trade                                 | Correspondence on TPD with specific companies Including Swedish Match, CECCM, ESTOC between 2010 and 2013 | 49                  | 2013/3874 |
| 25 Jul 13      | Markt                                 | Correspondence on TPD with BusinessEurope and VNO NCW since 2012                                          | 0                   | 2013/3926 |
| 25 Jul 13      | Legal                                 | Correspondence on TPD with BusinessEurope and VNO NCW since 2012                                          | 0                   | 2013/3911 |
| 25 Jul 13      | Sec Gen                               | Details of six meetings with tobacco industry between 2010 and 2012                                       | 0                   | 2013/3910 |
| 25 Jul 13      | ENTR/ Tajani                          | Correspondence on TPD with BusinessEurope, VNO NCW, and DCI Group since 2012                              | 0                   | 2013/3927 |
| 25 Jul 13      | Oettinger                             | Correspondence on TPD with BusinessEurope, VNO NCW, and                                                   | 0                   | 2013/3913 |

| DCI Group since 2012 |                   |                                                                                                                                            |    |                        |
|----------------------|-------------------|--------------------------------------------------------------------------------------------------------------------------------------------|----|------------------------|
| 9 Aug 13             | UK DH             | PMI's submission to DH of its views on the TPD, and other correspondence b/w DH and PMI on TPD                                             | 5  | In public domain       |
| 21 Aug 13            | Barroso           | Correspondence between Cabinet member Antonia Jose Cabral and tobacco industry, APED, CECCM, Bell Pottinger, DCI Group and Business Europe | 0  | 2013/4322              |
| 21 Aug 13            | RTD/Geoghan-Quinn | Correspondence on TPD with tobacco industry, specific national governments (SW, PL, RO, BL, CZ and GR) and Polish Chamber of Commerce      | 1  | 2013/4324              |
| 27 Nov 13            | AGRI              | Correspondence on TPD with private sector organisations and lobby groups from 2009                                                         | 44 | 2013/5961              |
| 27 Nov 13            | EMPL              | Correspondence on TPD with private sector organisations and lobby groups from 2009                                                         | 7  | 2013/5962              |
| 27 Nov 13            | REGIO             | Correspondence on TPD with private sector organisations and lobby groups from 2009                                                         | 0  | 2013/5963              |
| 27 Nov 13            | ENTR              | Correspondence on TPD with private sector organisations and lobby groups from 2009                                                         | 53 | 2013/5964              |
| 27 Nov 12            | Markt/<br>Barnier | Correspondence on TPD with private sector organisations and lobby groups from 2009                                                         | 23 | 2013/5959<br>2013/5969 |
| 27 Nov 13            | Hahn              | Correspondence on TPD with private sector organisations and lobby groups from 2009                                                         | 28 | 2013/5970              |
| 27 Nov 13            | Andor             | Correspondence on TPD with private sector organisations and lobby groups from 2009                                                         | 11 | 2013/5971              |
| 27 Nov 13            | Ciolas            | Correspondence on TPD with private sector organisations and lobby groups from 2009                                                         | 39 | 2013/5973              |
| 27 Nov 13            | Barroso           | Correspondence on TPD with private sector organisations and lobby groups from 2009                                                         | 24 | 2013/5976              |
| 27 Nov 13            | Tajani            | Correspondence on TPD with private sector organisations and lobby groups from 2009                                                         | 19 | 2013/5972              |
| 27 Nov 13            | Semeta            | Correspondence on TPD with private sector organisations and lobby groups from 2009                                                         | 0  | 2013/5975              |
| 27 Nov 13            | Almunia           | Correspondence on TPD with private sector organisations and lobby groups from 2009                                                         | 22 | 2013/5977              |
| 27 Nov 13            | Reding            | Correspondence on TPD with private sector organisations and lobby groups from 2009                                                         | 20 | 2013/5978              |
| 27 Nov 13            | Lewandowski       | Correspondence on TPD with private sector organisations and lobby groups from 2009                                                         | 41 | 2013/5979              |
| 27 Nov 13            | Rehn              | Correspondence on TPD with private sector organisations and lobby groups from 2009                                                         | 7  | 2013/5980              |
| 4 Dec 13             | COMP              | Correspondence on TPD with private sector organisations and lobby groups from 2009                                                         | 19 | 2013/6098              |
| 4 Dec 13             | JUST              | Correspondence on TPD with private sector organisations and lobby groups from 2009                                                         | 8  | 2013/6099              |
| 4 Dec 13             | Eurostat          | Correspondence on TPD or tobacco market with third parties from 2010                                                                       | 0  | 2014/642               |
| 4 Feb 14             | OLAF              | Correspondence on TPD with private sector organisations and lobby groups from 2010                                                         | 0  | 2014/643               |
